# Supplementary material
Source: Springer Nature journal article supplement (https://www.springermedizin.de/resource/supplementary/12943_2014_1453_MOESM6_ESM.pdf/9553046)

**A**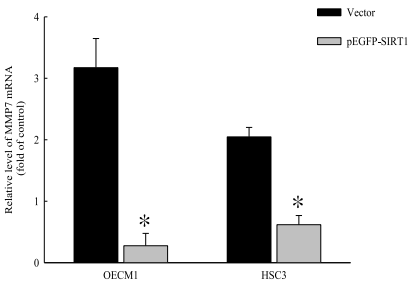**B**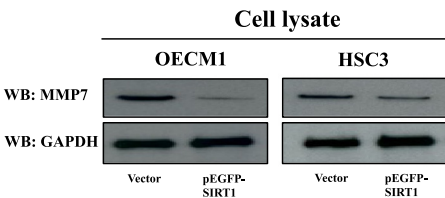**C**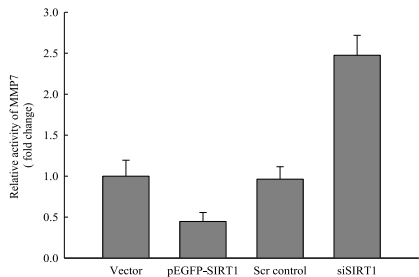**Zymography**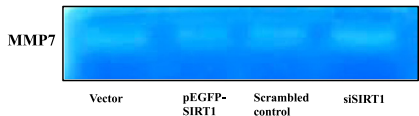**D**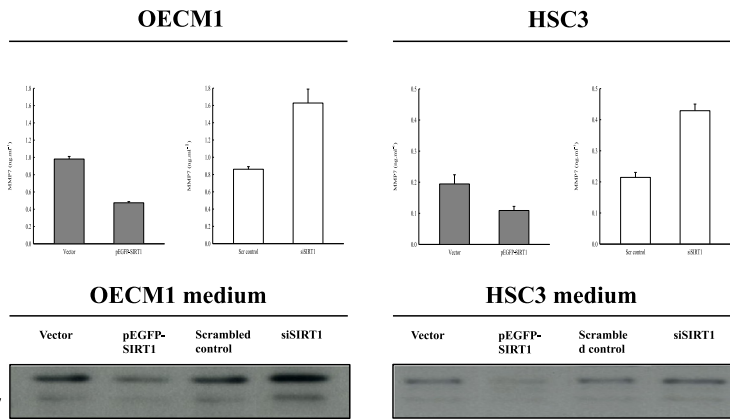

Supplement: MOESM6 [file 9553046]
